# Supplementary material for: Low lattice thermal conductivities and good thermoelectric performance of hexagonal antiperovskites X(Ba & Sr)3BiN with quartic anharmonicity
Source: Royal Society of Chemistry journal article supplement (doi:10.1039/d3cp03248e), 2023-01-01
Supplement: d3cp03248e1.pdf [file d3cp03248e1.pdf]

# Low Lattice Thermal Conductivities and good thermoelectric performance of Hexagonal Antiperovskites $X(\text{Ba} \& \text{Sr})_3\text{BiN}$ with Quartic Anharmonicity

Shuming Zeng,<sup>1,\*</sup> Xiang Yan,<sup>1</sup> Qian Shen,<sup>1</sup> Yusong Tu,<sup>1</sup> Hao Huang,<sup>2,†</sup> and Geng Li<sup>3,4,‡</sup>

<sup>1</sup>*College of Physics Science and Technology,  
Yangzhou University, Jiangsu 225009, China*

<sup>2</sup>*Advanced Copper Industry College,  
Jiangxi University of Science and Technology, Yingtan 335000, China*

<sup>3</sup>*School of Materials Science and Engineering,  
National Institute for Advanced Materials, Nankai University,  
Tongyan Road 38, Tianjin 300350, China.*

<sup>4</sup>*National Supercomputer Center in Tianjin, Tianjin 300457, China.*

(Dated: August 19, 2023)

---

\* zengsm@yzu.edu.cn

† huanghao201116@sina.cn

‡ ligeng@nscc-tj.cn

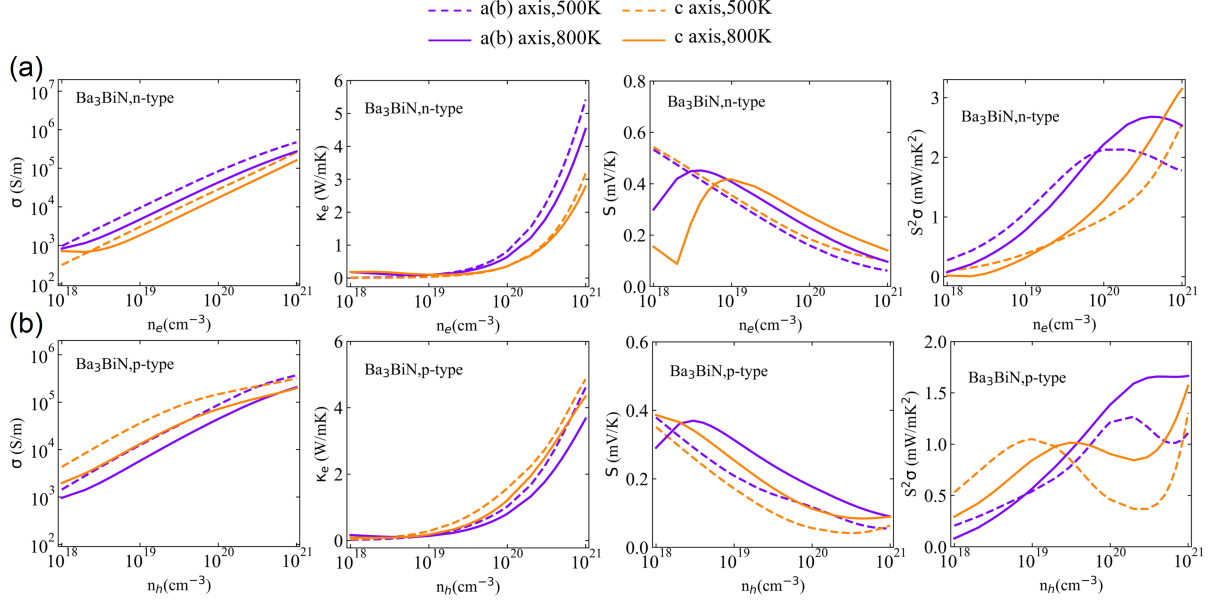

FIG. S1. The calculated electron conductivities  $\sigma$ , electronic thermal conductivity  $\kappa_e$ , Seebeck coefficient  $S$ , and power factor ( $PF$ ), for n-type and p-type doping levels ranging from  $1.0 \times 10^{18}$  to  $1.0 \times 10^{21} \text{ cm}^{-3}$ , at 500 K and 800 K for  $\text{Ba}_3\text{BiN}$ .

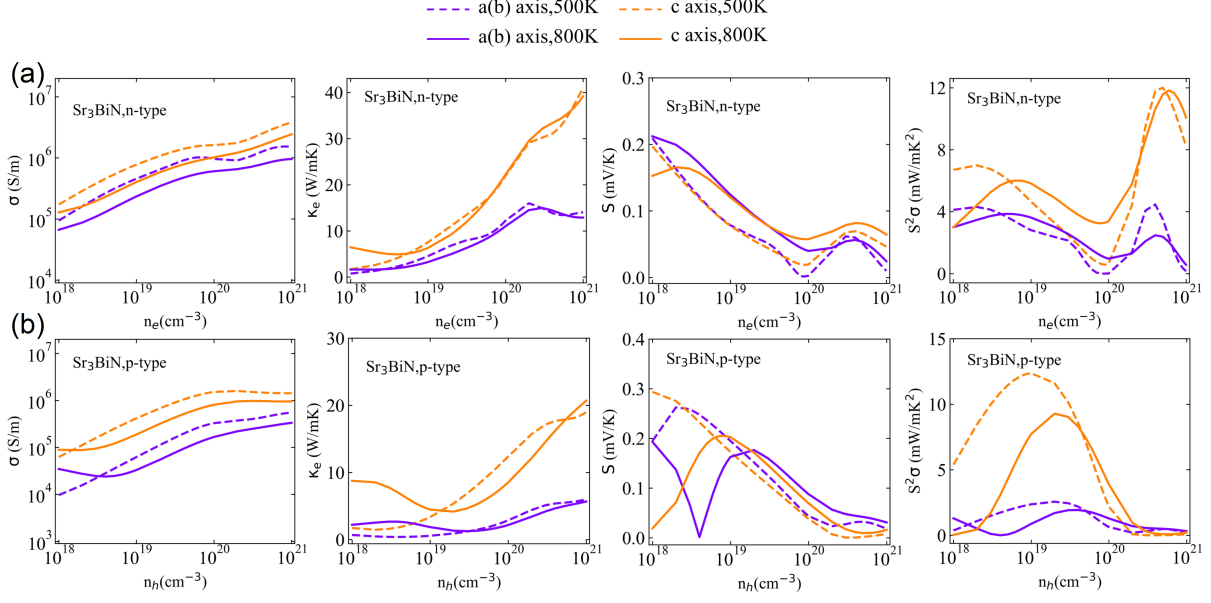

FIG. S2. The calculated electron conductivities  $\sigma$ , electronic thermal conductivity  $\kappa_e$ , Seebeck coefficient  $S$ , and power factor ( $PF$ ), for n-type and p-type doping levels ranging from  $1.0 \times 10^{18}$  to  $1.0 \times 10^{21} \text{ cm}^{-3}$ , at 500 K and 800 K for  $\text{Sr}_3\text{BiN}$ .

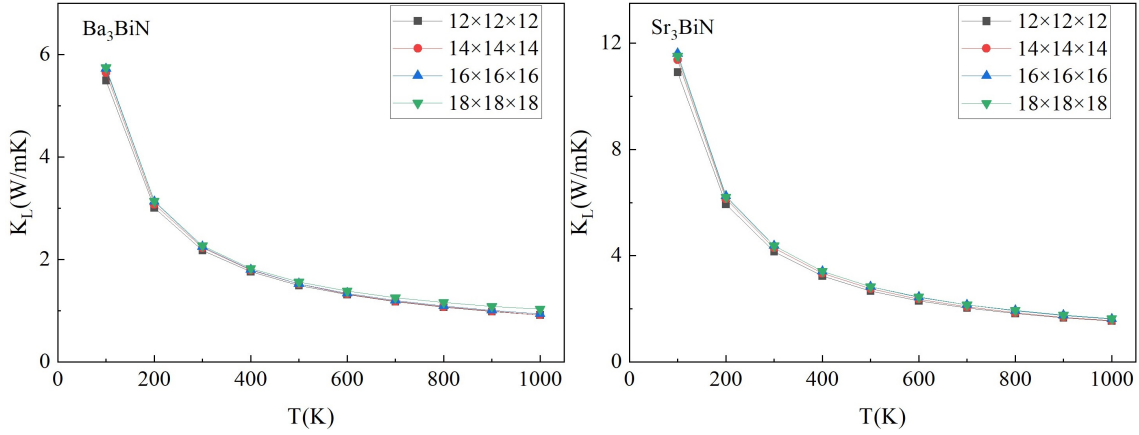

FIG. S3. The lattice thermal conductivities ( $\kappa_L$ ) of  $\text{Ba}_3\text{BiN}$  and  $\text{Sr}_3\text{BiN}$  calculated with different q-points at different temperatures using SCP+BTE method. It can be concluded that the  $\kappa_L$  values converge when q-point density is greater than  $16 \times 16 \times 16$  at temperatures range from 100 to 1000K.
